# Supplementary material for: Enabling electrochemical conversion of N2 to NH3 under ambient conditions by a CoP3 nanoneedle array
Source: Royal Society of Chemistry journal article supplement (doi:10.1039/d0ta07720h), 2020-01-01
Supplement: d0ta07720h1.pdf [file d0ta07720h1.pdf]

## Supplementary Information

### Experimental section

**Materials:**  $\text{Co}(\text{NO}_3)_2 \cdot 6\text{H}_2\text{O}$ ,  $\text{NH}_4\text{F}$ , Urea( $\text{CH}_4\text{N}_2\text{O}$ ),  $\text{NH}_4\text{Cl}$ ,  $\text{N}_2\text{H}_4 \cdot \text{H}_2\text{O}$ ,  $\text{HNO}_3$ ,  $\text{HCl}$ ,  $\text{Na}_2\text{SO}_4$ ,  $\text{NaOH}$ ,  $\text{C}_2\text{H}_5\text{OH}$  were purchased from Aladdin Ltd. (Shanghai, China). Sodium salicylic ( $\text{C}_7\text{H}_5\text{O}_3\text{Na}$ ), p-dimethylaminobenzaldehyde ( $\text{C}_9\text{H}_{11}\text{NO}$ ), sodium citrate dehydrate ( $\text{C}_6\text{H}_5\text{Na}_3\text{O}_7 \cdot 2\text{H}_2\text{O}$ ), sodium nitroferricyanide dihydrate ( $\text{C}_5\text{FeN}_6\text{Na}_2\text{O} \cdot 2\text{H}_2\text{O}$ ), sodium hypochlorite solution ( $\text{NaClO}$ ) were purchased from Beijing Chemical Corp. (China). 117 Nafion membrane (Alfa Aesar), 5wt % Nafion (Dupont). All chemicals were used as received without further purification. Carbon cloth (CC) was Provided by Hongshan District, Wuhan Instrument Surgical Instruments business. And it was pretreated in  $\text{HNO}_3$  and then cleaned by sonication in water and  $\text{C}_2\text{H}_5\text{OH}$  for several times to remove surface impurities. The water used throughout all experiments was purified through a Millipore system.

**Preparation of  $\text{Co}(\text{OH})\text{F}/\text{CC}$  :**  $\text{Co}(\text{OH})\text{F}/\text{CC}$  was prepared as follows. In a typical synthesis,  $\text{Co}(\text{NO}_3)_2 \cdot 6\text{H}_2\text{O}$  (0.582 g),  $\text{NH}_4\text{F}$  (0.186 g) and urea (0.60 g) were dissolved in deionized water (40 mL) in a 50 mL beaker. After continuously stirring for 30 min, the solution was then transferred to a 50 mL Teflon-lined autoclave with a piece of CC (2 cm  $\times$  3 cm). The autoclave was heated to 120 °C, and kept at that temperature for 6 h. After cooling to room temperature, the resulting precipitates were washed several times with deionized water, and then dried at 60 °C for 6 h. Then the  $\text{Co}(\text{OH})\text{F}/\text{CC}$  was obtained.

**Preparation of  $\text{CoP}_3/\text{CC}$  :** The synthesis method of  $\text{CoP}_3/\text{CC}$  is to take a small piece of 2 cm long and 1 cm wide precursor carbon cloth and 30 mg of red phosphorus into a small quartz tube and vacuum seal, then the small quartz tube is heated in a muffle furnace, with 650 °C for 5 h. Finally, the carbon cloth was taken out and washed with water and alcohol several times at room temperature for 10 h to obtain a  $\text{CoP}_3/\text{CC}$  (loading: 1.01  $\text{mg cm}^{-2}$ ).

**Preparation of  $\text{CoP}_2/\text{CC}$  and  $\text{CoP}/\text{CC}$ :** The synthesis scheme of  $\text{CoP}_2/\text{CC}$  and  $\text{CoP}/\text{CC}$  is the same as the synthesis scheme of  $\text{CoP}_3/\text{CC}$ . But the amount of red phosphorus is 2/3 and 1/3 respectively. Finally,  $\text{CoP}_2/\text{CC}$  (loading: 1.21  $\text{mg cm}^{-2}$ ) and

CoP/CC (loading: 1.32 mg cm<sup>-2</sup>) materials can be obtained.

**Characterization:** The XRD patterns were obtained from a LabX XRD-6100 X-ray diffractometer with Cu K $\alpha$  radiation (40 kV, 30 mA) of wavelength 0.154 nm (SHIMADZU, Japan). The X-ray photoelectron spectroscopy (XPS) measurements were performed on an ESCALABMK II X-ray photoelectron spectrometer using Mg as the exciting source. The scanning electron microscopy (SEM) measurements were carried out on a XL30 ESEM FEG scanning electron microscope at an accelerating voltage of 20 kV. Transmission electron microscopy (TEM) characterization was performed using a HITACHI H-8100 electron microscopy (Hitachi, Tokyo, Japan) operated at 200 kV. The UV-visible adsorption spectra were recorded on a spectrophotometer (Shimadzu, UV-1800).

**Determination of NH<sub>3</sub>:** 4 mL of sample was removed from the cathodic chamber, then added into 50  $\mu$ L of oxidizing solution containing NaClO ( $\rho_{Cl} = 4\sim 4.9$ ) and NaOH (0.75 M), then added 500  $\mu$ L coloring solution containing 0.4 M C<sub>7</sub>H<sub>6</sub>O<sub>3</sub> and 0.32 M NaOH and 50  $\mu$ L catalyst solution (0.1 g Na<sub>2</sub>[Fe(CN)<sub>5</sub>NO]·2H<sub>2</sub>O diluted to 10 ml with deionized water) in turn. Absorbance measurements were performed after two hour at  $\lambda = 655$  nm. Rate of NH<sub>3</sub> formation was calculated using the following equation:

$$R_{NH_3} (\text{mol}\cdot\text{cm}^{-2}\cdot\text{s}^{-1}) = \frac{x (\text{ppm}) \times 10^{-3}(\text{g/mg}) \times V(\text{L})}{Mr_{NH_4^+} (\text{g/mol}) \times t(\text{s}) \times S(\text{cm}^{-2})}$$

Where:

$R_{NH_3}$  (mol·cm<sup>-2</sup>·s<sup>-1</sup>): is ammonia formation rate in mol·cm<sup>-2</sup>·s<sup>-1</sup>,

X (ppm): is ammonia concentration in the detection solution in ppm (mg/L),

V (L): is volume of solution in litter,

$Mr_{NH_4^+} = 18$  (g/mol),

t (s): is the reaction time in seconds,

S: is active area of the membrane electrode in cm<sup>2</sup>.

**Determination of FE:** Assuming 3 electrons were needed to produce one NH<sub>3</sub> molecule, the FE in 0.1 M Na<sub>2</sub>SO<sub>4</sub> could be calculated as follows:

$$FE_{NH_3}(\%) = \frac{3 \times R_{NH_3}(\text{mol} \cdot \text{cm}^{-2} \cdot \text{s}^{-1}) \times t(\text{s}) \times S(\text{cm}^{-2}) \times F}{I(\text{A}) \times t(\text{s})}$$

where:

F is the Faraday constant,

I(A): the average of current during the reaction.

**Electrochemical measurement:** Electrochemical measurements were performed with a CHI660E electrochemical analyzer (CH Instruments, Inc.) in a standard three-electrode setup, with the use of CoP<sub>3</sub>/CC as the working electrode, a graphite rod as the counter electrode and a saturated Ag/AgCl electrode as the reference electrode. The reaction cell was separated by Nafion 117 membrane. Polarization curves were obtained using linear sweep voltammetry with a scan rate of 5 mV s<sup>-1</sup> and were the steady-state ones after several cycles. In all measurements, saturated Ag/AgCl electrode was calibrated with respect to RHE as following: in 0.1 M Na<sub>2</sub>SO<sub>4</sub> aqueous solution, E(RHE) = E(Ag/AgCl) + 0.059 × pH + 0.197 V. All experiments were carried out at room temperature (~ 25 °C). The presented current density referred to the geometrical area of the Carbon cloth. For N<sub>2</sub> reduction experiments, the electrolyte was purged with N<sub>2</sub> for 30 min before the measurement. Pure N<sub>2</sub> was continuously fed into the cathodic compartment with a flow rate of 10 cm<sup>3</sup> min<sup>-1</sup> during the experiments.

**DFT methods:** The present first principle calculations are performed with the projector augmented wave (PAW) method based on DFT. The exchange-functional is treated using the generalized gradient approximation (GGA) of Perdew-Burke-Ernzerhof (PBE) functional. The cut-off energy of the plane-wave basis is set at 400 eV for optimize calculations of atoms optimization. The vacuum spacing in a direction perpendicular to the plane of the catalyst is at least 10 Å. The Brillouin zone integration is performed using 3 × 3 × 1 Monkhorst and Pack k-point sampling for interface. The self-consistent calculations apply a convergence energy threshold of 10<sup>-6</sup> eV. The maximum Hellmann-Feynman force for each ionic optimization step is 0.05 eV/Å. In addition, spin polarizations is also considered in all calculations. Finally, the free energies are obtained by G=E<sub>total</sub>+E<sub>ZPE</sub>-TS, where E<sub>total</sub>, E<sub>ZPE</sub>, and TS are the ground-state energy, zero-point energies, and entropy terms, respectively. In our

calculation, the bottom layers (three layers) were kept fixed at their bulk position. The vibrational frequencies and entropies of molecules in the gas phase were taken from the NIST database.

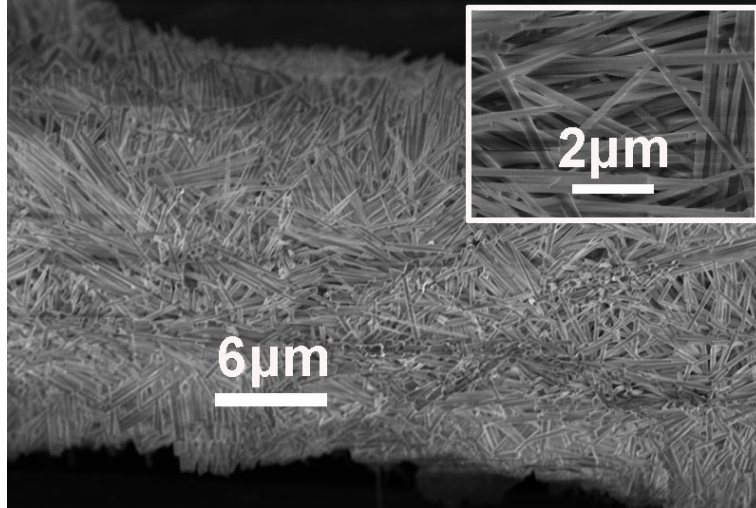

**Fig. S1.** SEM images of hydroxide precursor.

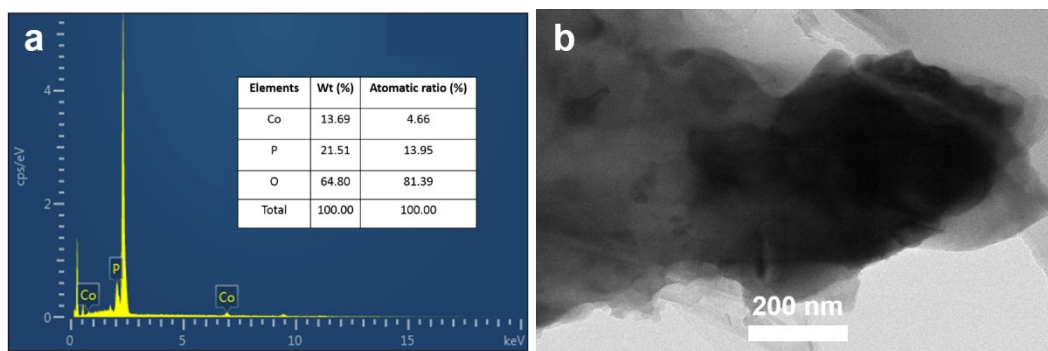

**Fig. S2.** (a) EDX spectrum of  $\text{CoP}_3$ . (b) TEM image of a single  $\text{CoP}_3$  nanoneed.

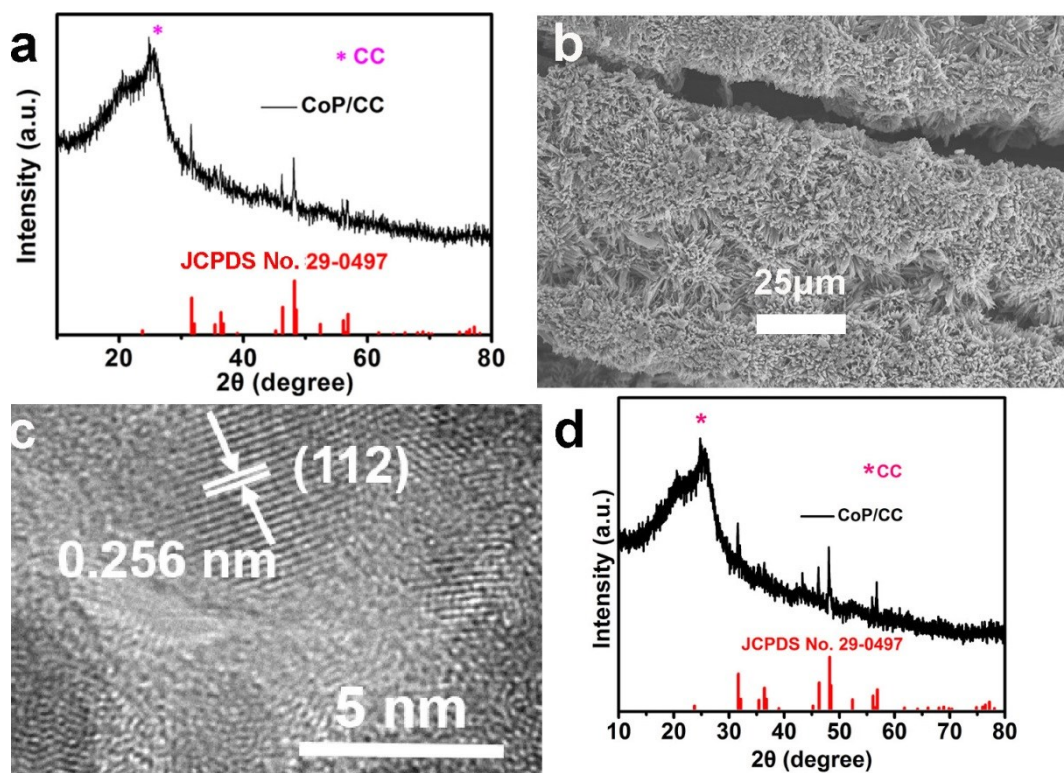

**Fig. S3.** (a) XRD pattern for CoP/CC. (b) SEM image for CoP/CC. (c) HRTEM image for CoP. (d) XRD pattern for CoP/CC after long-term NRR electrolysis.

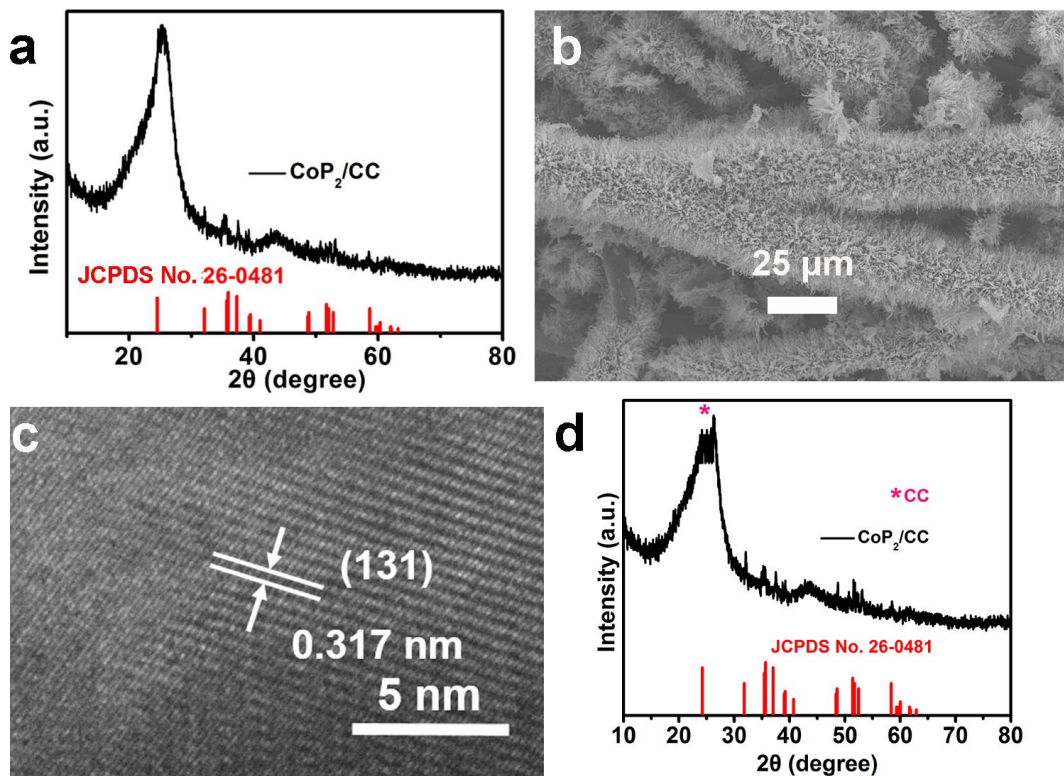

**Fig. S4.** (a) XRD pattern for CoP<sub>2</sub>/CC. (b) SEM image for CoP<sub>2</sub>/CC. (c) HRTEM image for CoP<sub>2</sub>. (d) XRD pattern for CoP<sub>2</sub>/CC after long-term NRR electrolysis.



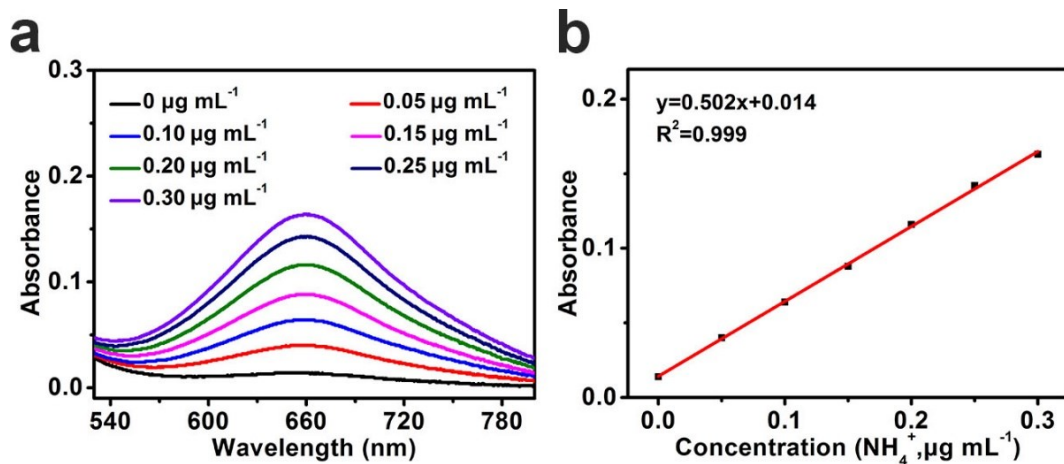

**Fig. S5.** (a) UV-Vis absorption spectra of indophenol assays with  $\text{NH}_4^+$  ions after incubated for 2 h at room temperature. (b) Calibration curve used for estimation of  $\text{NH}_4^+$ .

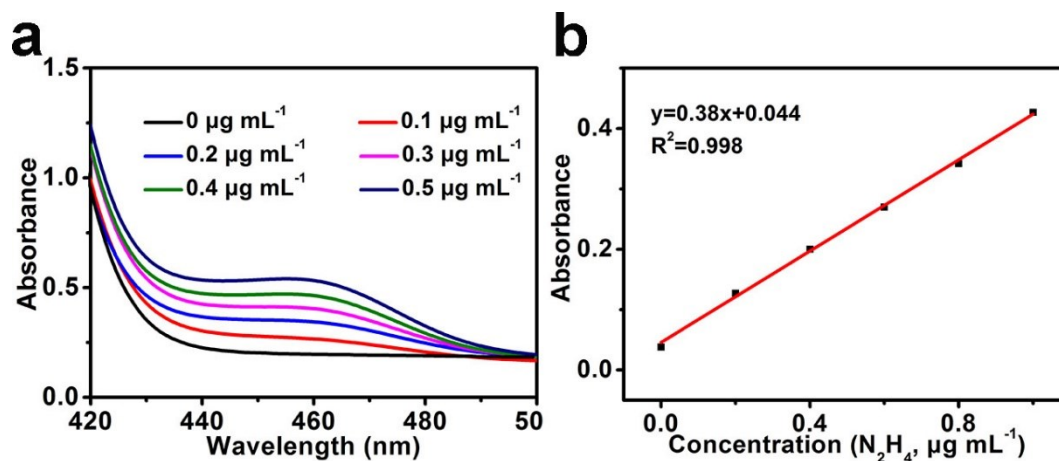

**Fig. S6.** (a) UV-Vis absorption spectra of various  $\text{N}_2\text{H}_4$  concentrations after adding into chemical indicator by the method of Watt. (b) Calibration curve used for calculation of  $\text{N}_2\text{H}_4$  concentrations.

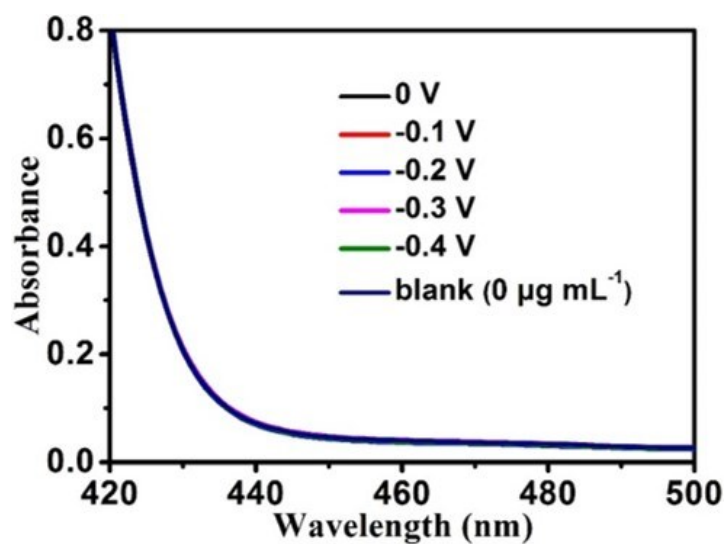

**Fig. S7.** UV-Vis absorption spectra of the electrolytes estimated by the method of Watt and Chrisp before and after 2 h electrolysis in N<sub>2</sub> atmosphere at each given potential at ambient conditions using CoP<sub>3</sub>/CC as the working electrode.

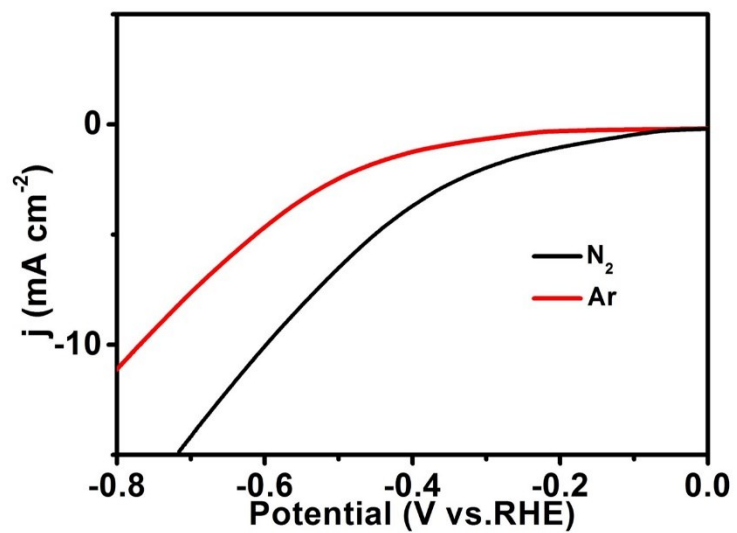

**Fig. S8.** LSV curves of CoP<sub>3</sub>/CC in Ar- and N<sub>2</sub>-saturated 0.1 M Na<sub>2</sub>SO<sub>4</sub> at a scan rate of 5 mV s<sup>-1</sup>.

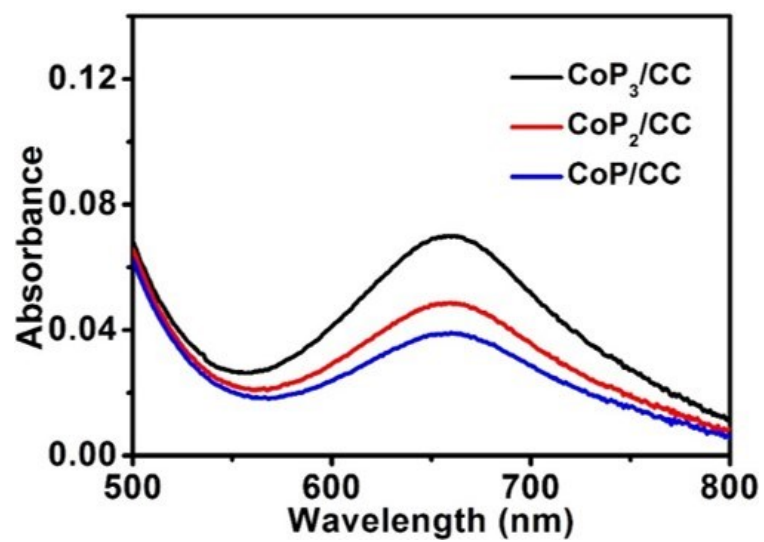

**Fig. S9.** UV-Vis absorption spectra of the electrolyte stained with indophenol indicator after charging at  $-0.20$  V for 2 h under different electrode conditions.

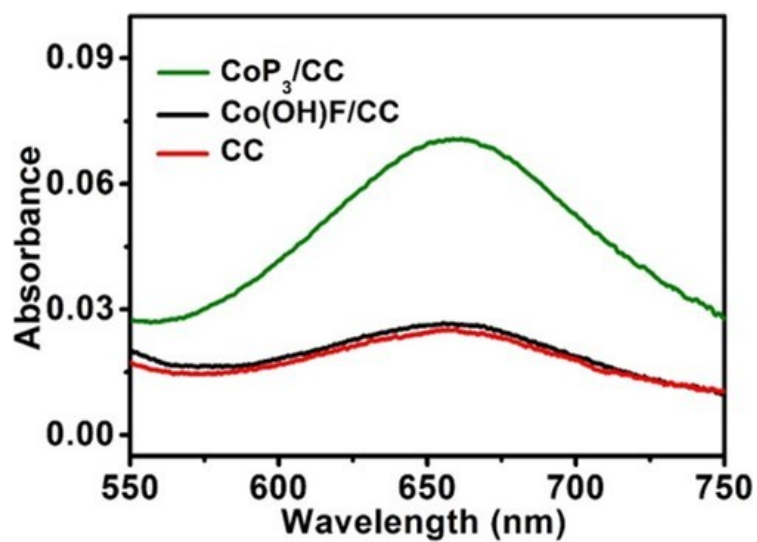

**Fig. S10.** UV-Vis absorption spectra of the electrolyte stained with indophenol indicator after charging at  $-0.20$  V for 2 h under different electrode conditions.

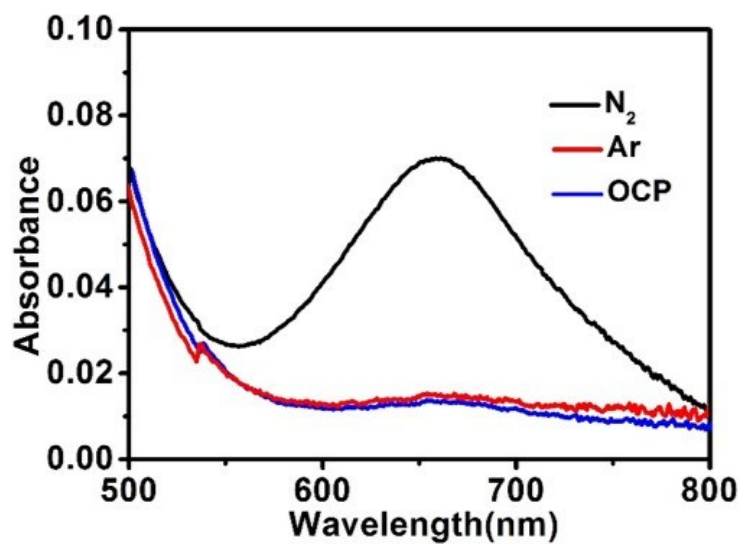

**Fig. S11.** UV-Vis absorption spectra of the electrolyte stained with indophenol indicator after charging at  $-0.20$  V for 2 h under different electrochemical conditions.

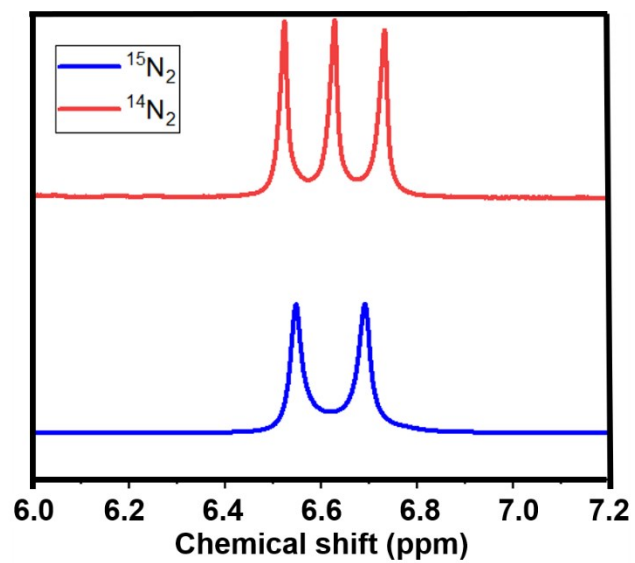

**Fig. S12.** <sup>15</sup>N isotope labeling experiment. <sup>1</sup>H NMR spectra for the post-electrolysis 0.1 M Na<sub>2</sub>SO<sub>4</sub> electrolytes with <sup>15</sup>N<sub>2</sub> and <sup>14</sup>N<sub>2</sub> as the feeding gas.



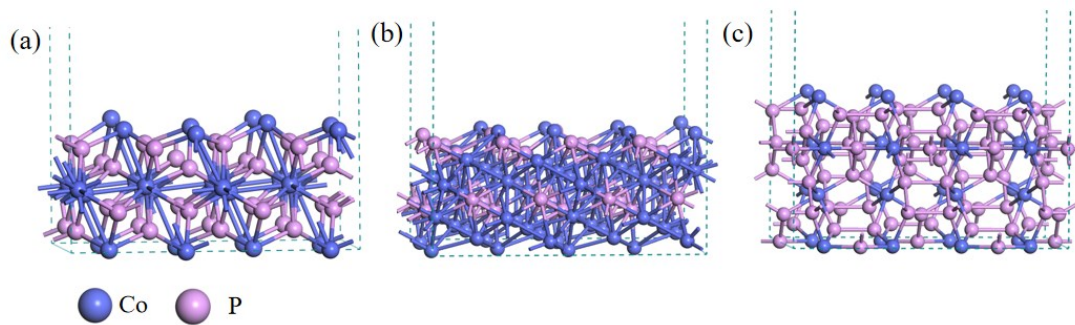

**Fig. S13.** Surface structures of (a) CoP, (b) CoP<sub>2</sub>, (c) CoP<sub>3</sub>.

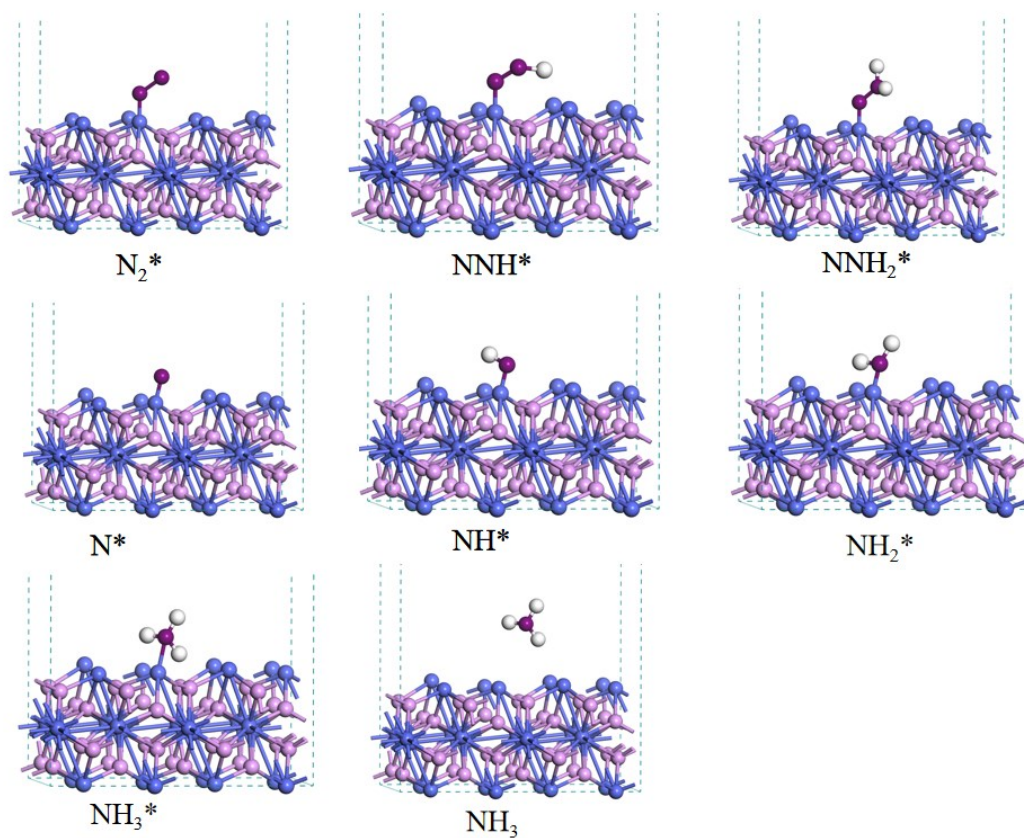

**Fig. S14.** The corresponding structure diagram of  $N_2$  reduced to  $NH_3$  on the surface of CoP ( $N_2$ - $NNH$ ,  $NNH_2$ ,  $N$ ,  $NH$ ,  $NH_2$ ,  $NH_3$ ).

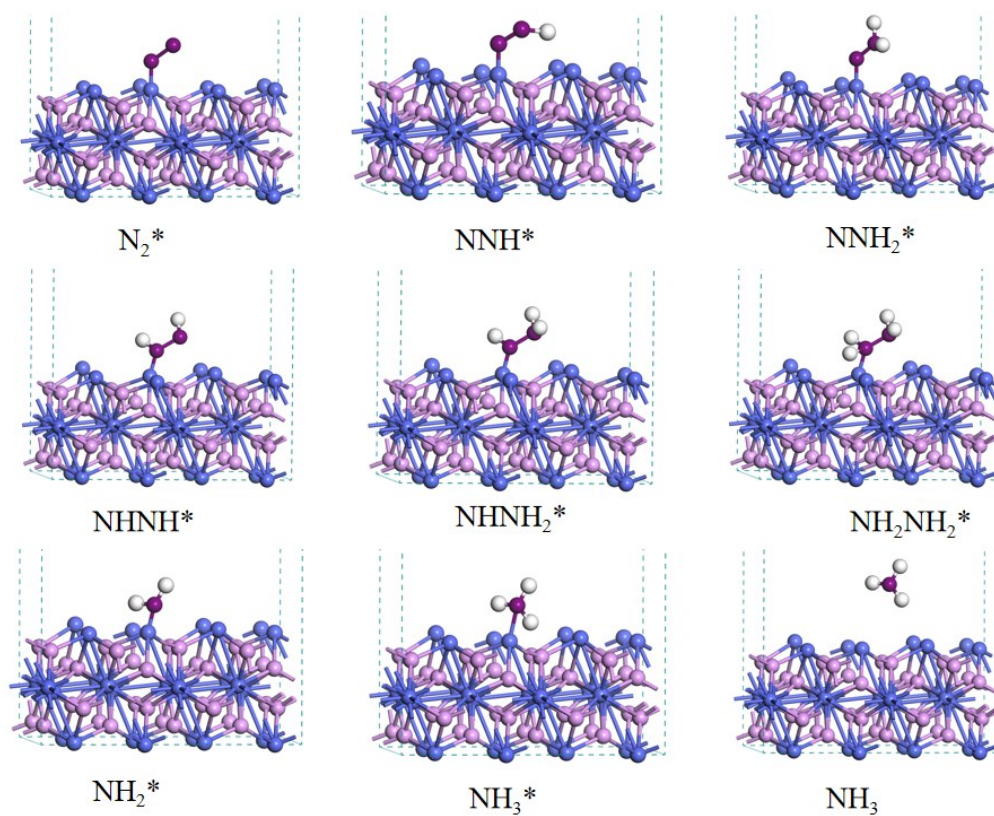

**Fig. S15.** The corresponding structure diagram of  $N_2$  reduced to  $NH_3$  on the surface of CoP ( $N_2$ - $NNH$ ,  $NHH$ ,  $NHH_2$ ,  $NH_2NH_2$ ,  $NH_2$ ,  $NH_3$ ).

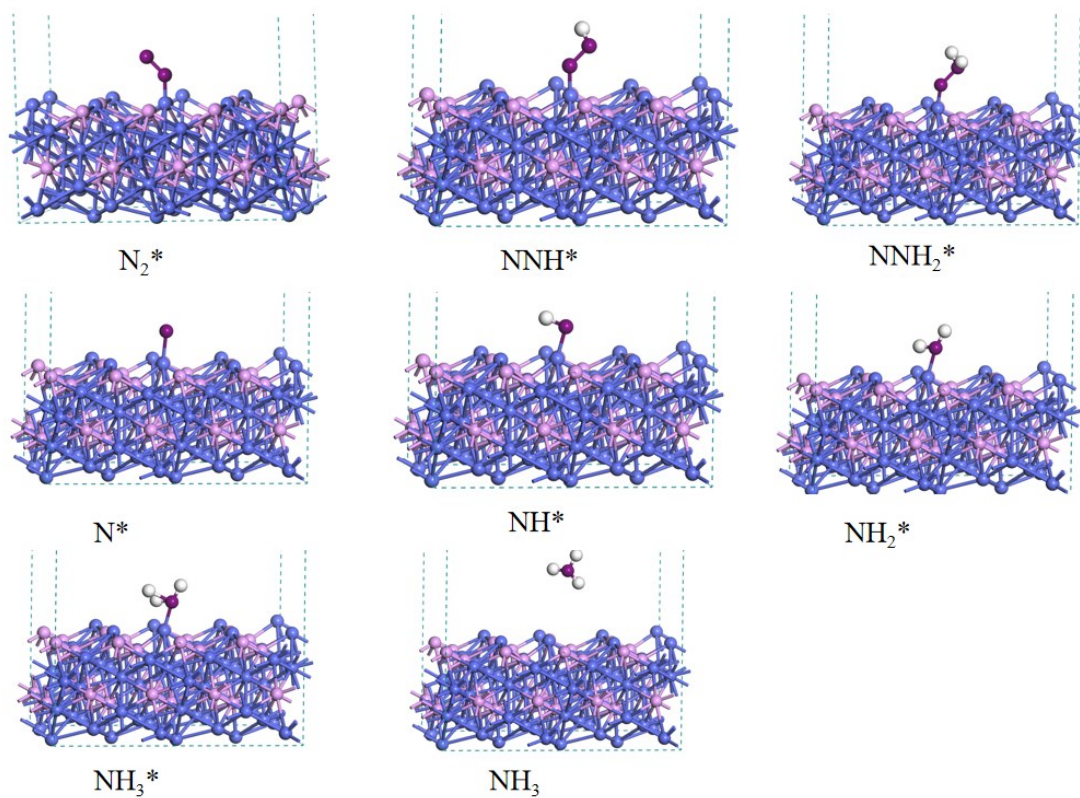

**Fig. S16.** The corresponding structure diagram of  $N_2$  reduced to  $NH_3$  on the surface of  $CoP_2$  ( $N_2$ - $NNH$ ,  $NNH_2$ ,  $N$ ,  $NH$ ,  $NH_2$ ,  $NH_3$ ).

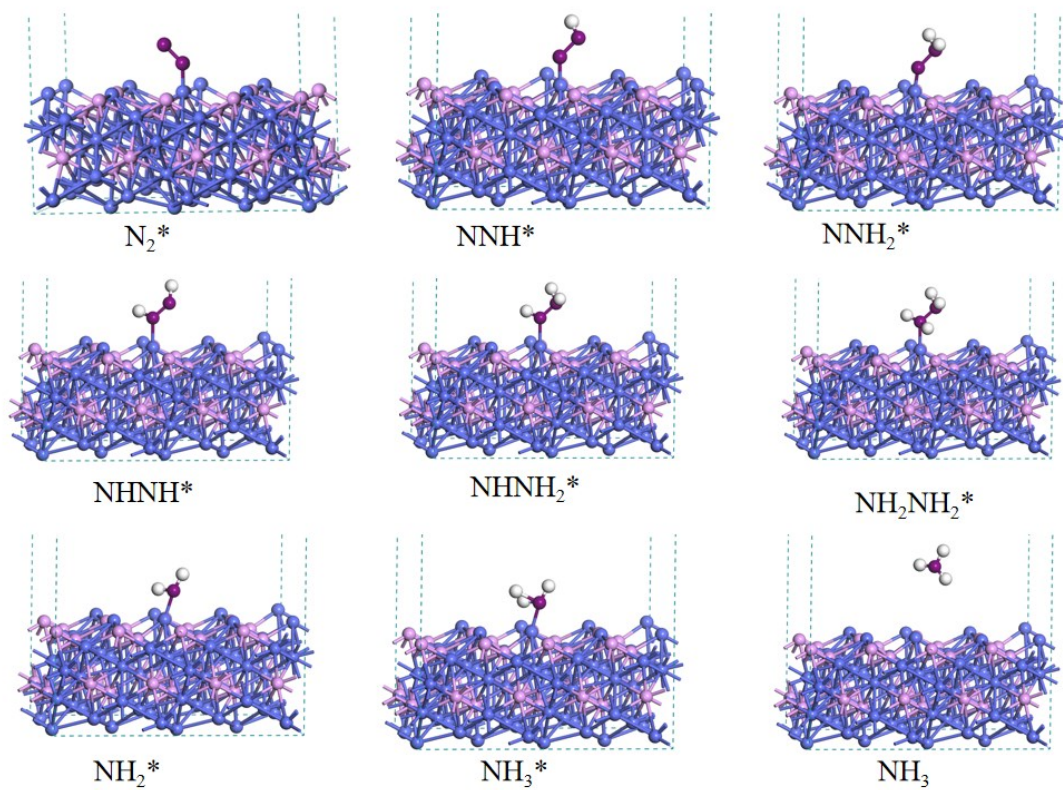

**Fig. S17.** The corresponding structure diagram of  $N_2$  reduced to  $NH_3$  on the surface of  $CoP_2$  ( $N_2$ - $NNH$ ,  $NHNH$ ,  $NHNH_2$ ,  $NH_2NH_2$ ,  $NH_2$ ,  $NH_3$ ).



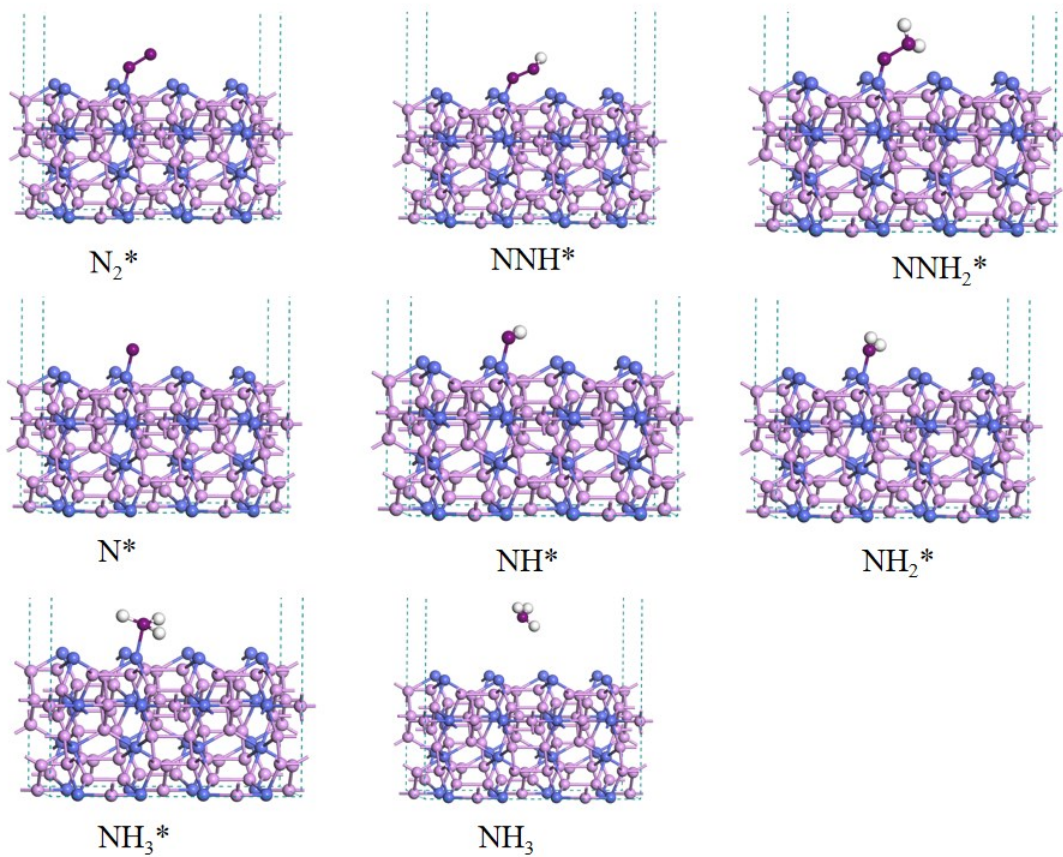

**Fig. S18.** The corresponding structure diagram of  $N_2$  reduced to  $NH_3$  on the surface of  $CoP_3$  ( $N_2$ - $NNH$ ,  $NNH_2$ ,  $N$ ,  $NH$ ,  $NH_2$ ,  $NH_3$ ).

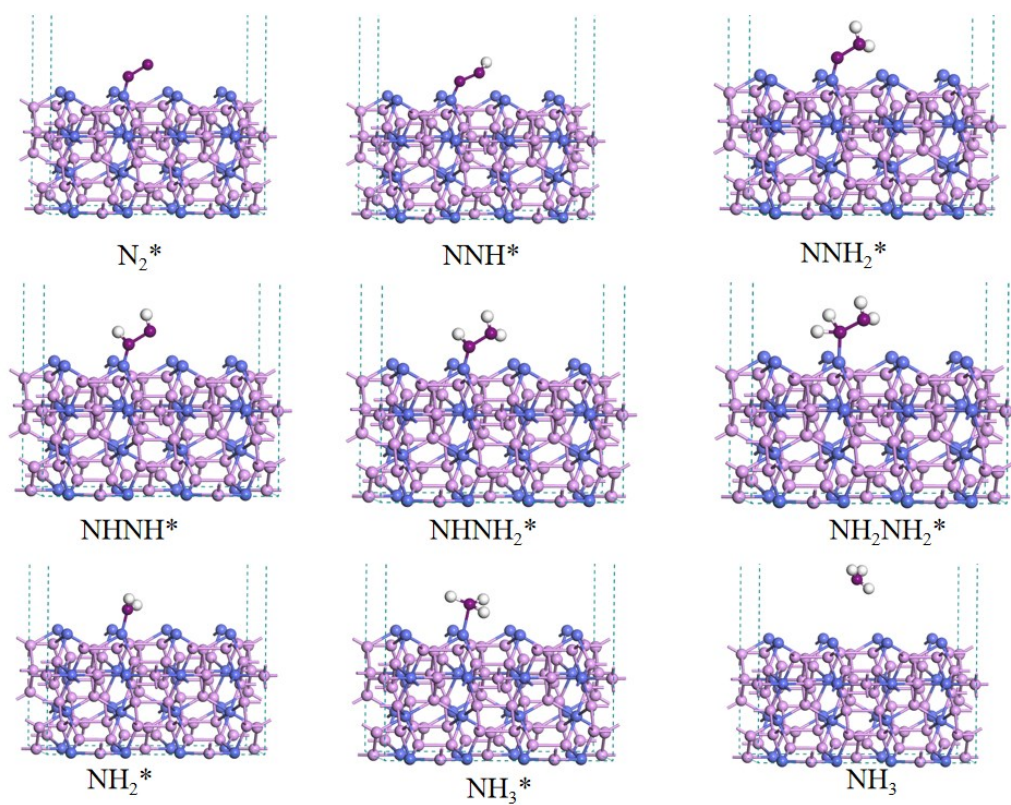

**Fig. S19.** The corresponding structure diagram of  $N_2$  reduced to  $NH_3$  on the surface of  $CoP_3$  ( $N_2$ - $NNH$ ,  $NHNH$ ,  $NHNH_2$ ,  $NH_2NH_2$ ,  $NH_2$ ,  $NH_3$ ).

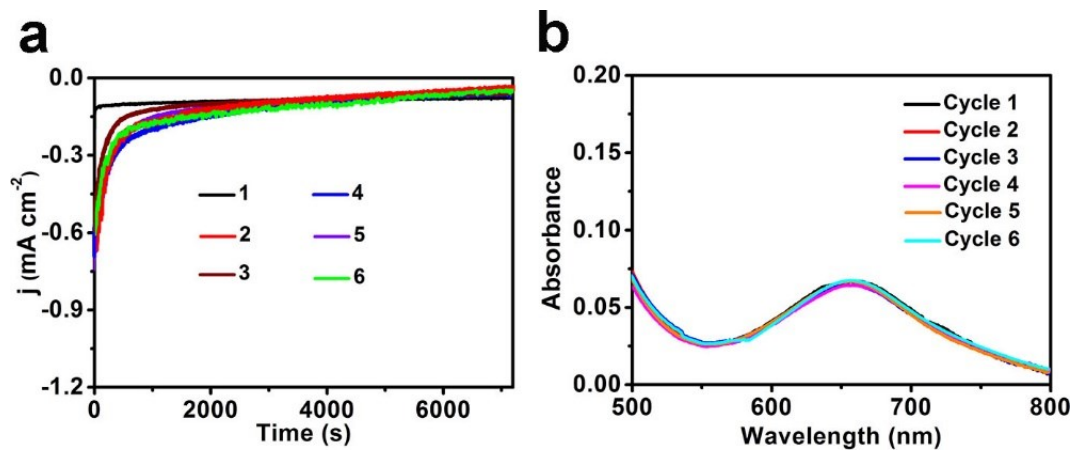

**Fig. S20.** (a) Time-dependent current density curves of CoP<sub>3</sub>/CC in 0.1 M Na<sub>2</sub>SO<sub>4</sub> N<sub>2</sub>-saturated solution at -0.2 V vs. RHE. (b) UV-Vis absorption spectra of the electrolytes stained with indophenol indicator after NRR electrolysis for 2 h.



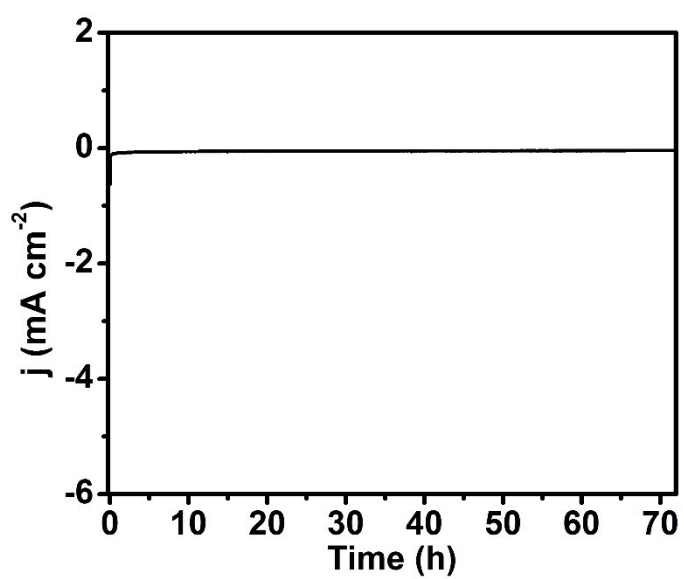

**Fig. S21.** Time-dependent current density curve at potential of  $-0.2$  V using  $\text{CoP}_3/\text{CC}$  catalyst for 72 h.

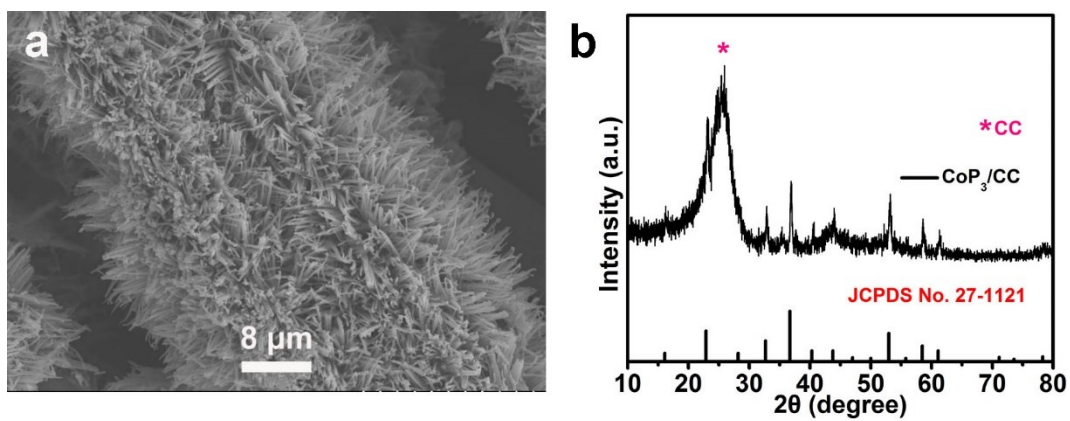

**Fig. S22.** (a) SEM image of CoP<sub>3</sub>/CC after long-term electrocatalysis in 0.1 M Na<sub>2</sub>SO<sub>4</sub>. (b) XRD pattern for CoP<sub>3</sub>/CC after long-term NRR electrolysis.

**Table S1.** Comparison of the electrocatalytic NRR performance of CoP<sub>3</sub>/CC with other catalysts.

| Catalyst                                 | Electrolyte                            | NH <sub>3</sub> yield                                     | FE (%) | Ref.      |
|------------------------------------------|----------------------------------------|-----------------------------------------------------------|--------|-----------|
| CoP <sub>3</sub> /CC                     | 0.1 M Na <sub>2</sub> SO <sub>4</sub>  | $3.61 \times 10^{-11} \text{ mol s}^{-1} \text{ cm}^{-2}$ | 11.94  | This work |
| CoP HNC                                  | 1.0 M KOH                              | 10.78 $\mu\text{g h}^{-1} \text{ mg}^{-1}_{\text{cat}}$   | 7.36   | 1         |
| CoP/CNs                                  | 0.1 M Na <sub>2</sub> SO <sub>4</sub>  | 48.9 $\mu\text{g h}^{-1} \text{ mg}^{-1}_{\text{cat}}$    | 8.7    | 2         |
| MoS <sub>2</sub> /CC                     | 0.1 M Na <sub>2</sub> SO <sub>4</sub>  | $8.08 \times 10^{-11} \text{ mol s}^{-1} \text{ cm}^{-2}$ | 1.17   | 3         |
| Boron-doped graphene                     | 0.5 M Na <sub>2</sub> SO <sub>4</sub>  | 9.8 $\mu\text{g h}^{-1} \text{ mg}^{-1}_{\text{cat}}$     | 10.8   | 4         |
| Fe <sub>2</sub> O <sub>3</sub> nanorods  | 0.1 M Na <sub>2</sub> SO <sub>4</sub>  | 15.9 $\mu\text{g h}^{-1} \text{ mg}^{-1}_{\text{cat}}$    | 0.94   | 5         |
| B <sub>4</sub> C                         | 0.1 M HCl                              | 26.57 $\mu\text{g h}^{-1} \text{ mg}^{-1}_{\text{cat}}$   | 15.95  | 6         |
| VN                                       | 0.1 M HCl                              | $2.48 \times 10^{-10} \text{ mol s}^{-1} \text{ cm}^{-2}$ | 3.58   | 7         |
| Fe <sub>2</sub> O <sub>3</sub> -CNT      | KHCO <sub>3</sub>                      | 0.22 $\mu\text{g h}^{-1} \text{ cm}^{-2}$                 | 0.15   | 8         |
| Au-Fe <sub>3</sub> O <sub>4</sub>        | 0.1 M Na <sub>2</sub> SO <sub>4</sub>  | 21.42 $\mu\text{g h}^{-1} \text{ mg}^{-1}_{\text{cat}}$   | 10.54  | 9         |
| TiO <sub>2</sub> /Ti                     | 0.1 M Na <sub>2</sub> SO <sub>4</sub>  | $9.16 \times 10^{-11} \text{ mol h}^{-1} \text{ cm}^{-2}$ | 2.5    | 10        |
| Mo nanofilm                              | 0.1 M Na <sub>2</sub> SO <sub>4</sub>  | 1.89 $\mu\text{g h}^{-1} \text{ cm}^{-2}$                 | 0.72   | 11        |
| Fe <sub>3</sub> C@C                      | 0.05 M Na <sub>2</sub> SO <sub>4</sub> | 8.53 $\mu\text{g h}^{-1} \text{ mg}^{-1}_{\text{cat}}$    | 9.15   | 12        |
| Cu/PI                                    | 0.1 M KOH                              | 12.4 $\mu\text{g h}^{-1} \text{ cm}^{-2}$                 | 6.56   | 13        |
| B-TiO <sub>2</sub>                       | 0.1 M Na <sub>2</sub> SO <sub>4</sub>  | 14.4 $\mu\text{g h}^{-1} \text{ mg}^{-1}_{\text{cat}}$    | 3.4    | 14        |
| La <sub>2</sub> O <sub>3</sub>           | 0.1 M Na <sub>2</sub> SO <sub>4</sub>  | 17.04 $\mu\text{g h}^{-1} \text{ mg}^{-1}_{\text{cat}}$   | 4.76   | 15        |
| Au nanorods                              | 0.1 M KOH                              | 1.648 $\mu\text{g h}^{-1} \text{ cm}^{-2}$                | 4      | 16        |
| S-CNS                                    | 0.1 M Na <sub>2</sub> SO <sub>4</sub>  | 19.07 $\mu\text{g h}^{-1} \text{ mg}^{-1}_{\text{cat}}$   | 7.47   | 17        |
| TiS <sub>2</sub>                         | 0.1 M Na <sub>2</sub> SO <sub>4</sub>  | 16.02 $\mu\text{g h}^{-1} \text{ mg}^{-1}_{\text{cat}}$   | 5.50   | 18        |
| C-TiO <sub>2</sub>                       | 0.1 M Na <sub>2</sub> SO <sub>4</sub>  | 16.22 $\mu\text{g h}^{-1} \text{ mg}^{-1}_{\text{cat}}$   | 1.84   | 19        |
| TiO <sub>2</sub> -rGO                    | 0.1 M Na <sub>2</sub> SO <sub>4</sub>  | 15.13 $\mu\text{g h}^{-1} \text{ mg}^{-1}_{\text{cat}}$   | 3.3    | 20        |
| Pd <sub>0.2</sub> Cu <sub>0.8</sub> /rGO | 0.1 M KOH                              | 2.80 $\mu\text{g h}^{-1} \text{ mg}^{-1}_{\text{cat}}$    | 4.5    | 21        |
| Bi <sub>2</sub> MoO <sub>6</sub>         | 0.1 M HCl                              | 20.46 $\mu\text{g h}^{-1} \text{ mg}^{-1}_{\text{cat}}$   | 8.17   | 22        |
| N-doped porous carbon                    | 0.05 M Na <sub>2</sub> SO <sub>4</sub> | 23.8 $\mu\text{g h}^{-1} \text{ mg}^{-1}_{\text{cat}}$    | 1.42   | 23        |

## References

- 1 W. Guo, Z. Liang, J. Zhao, B. Zhao, B. Zhu, K. Cai, R. Zou and Q. Xu, *Small Methods*, 2018, **2**, 1800204.
- 2 S. Zhang, W. Gong, Y. Lv, H. Wang, M. Han, G. Wang, T. Shi and H. Zhang, *Chem. Commun.*, 2019, **55**, 12376–12379.
- 3 L. Zhang, X. Ji, X. Ren, Y. Ma, X. Shi, Z. Tian, A. M. Asiri, L. Chen, B. Tang and X. Sun, *Adv. Mater.*, 2018, **30**, 1800191.
- 4 X. Yu, P. Han, Z. Wei, L. Huang, Z. Gu, S. Peng, J. Ma and G. Zheng, *Joule*, 2018, **2**, 1610–1622.
- 5 X. Xiang, Z. Wang, X. Shi, M. Fan and X. Sun, *ChemCatChem*, 2018, **10**, 4530–4535.
- 6 W. Qiu, X. Xie, J. Qiu, W. Fang, R. Liang, X. Ren, X. Ji, G. Cui, A. M. Arisi, G. Cui, B. Tang and X. Sun, *Nat. Commun.*, 2018, **9**, 3485.
- 7 X. Zhang, R. Kong, H. Du, L. Xia and F. Qu, *Chem. Commun.*, 2018, **54**, 5323–5325.
- 8 S. Chen, S. Perathoner, C. Ampelli, C. Mebrahtu, D. Su, G. Centi, *Angew. Chem., Int. Ed.*, 2017, **56**, 2699–2703.
- 9 J. Zhang, Y. Ji, P. Wang, Q. Shao, Y. Li and X. Huang, *Adv. Funct. Mater.*, 2019, **8**, 1906579.
- 10 R. Zhang, X. Ren, X. Shi, F. Xie, B. Zheng, X. Guo and X. Sun, *ACS Appl. Mater. Interfaces*, 2018, **10**, 28251–28255.
- 11 D. Yang, T. Chen and Z. Wang, *J. Mater. Chem. A*, 2017, **5**, 18967–18971.
- 12 M. Peng, Y. Qiao, M. Luo, M. Wang, S. Chu, Y. Zhao, P. Liu, J. Liu and Y. Tan, *ACS Appl. Mater. Interfaces*, 2019, **11**, 40062–40068.
- 13 Y. Lin, S. Zhang, Z. Xue, J. Zhang, H. Su, T. Zhao, G. Zhai, X. Li, M. Antonietti and J. Chen, *Nat. Commun.*, 2019, **10**, 4380.
- 14 Y. Wang, K. Jun, Q. Pan, Y. Xu, Q. Liu, G. Cui, X. Guo and X. Sun, *ACS Sustainable Chem. Eng.*, 2019, **7**, 117–122.
- 15 B. Xu, Z. Liu, W. Qiu, Q. Liu, X. Sun, G. Cui, Y. Wu and X. Xiong, *Electrochim. Acta.*, 2018, **298**, 106–111.

- 16 D. Bao, Q. Zhang, F. Meng, H. Zhong, M. Shi, Y. Zhang, J. Yan, Q. Jiang and X. Zhang, *Adv. Mater.*, 2017, **29**, 1604799.
- 17 L. Xia, X. Wu, Y. Wang, Z. Niu, Q. Liu, T. Li, X. Shi, A. M. Arisi and X. Sun, *Small Methods*, 2018, **6**, 1800251.
- 18 K. Jia, Y. Wang, L. Qiu, J. Gao, Q. Pan, W. Kong, X. Zhang, A. A. Alzahrani, K. A. Alzahrani, B. Zhong, X. Guo and L. Yang, *Inorg. Chem. Front.*, 2019, DOI: 10.1039/C91I00301K.
- 19 K. Jia, Y. Wang, Q. Pan, B. Zhong, Y. Luo, G. Cui, X. Guo and X. Sun, *Nanoscale*, 2019, **1**, 961–964
- 20 X. Zhang, Q. Liu, X. Shi, A. M. Arisi, Y. Luo, X. Sun, T. Li, *J. Mater. Chem. A*, 2018, **6**, 17303–17306.
- 21 M. Shi, D. Bao, S. Li, B. Wulan, J. Yan and Q. Jiang, *Adv. Energy Mater.*, 2018, **8**, 1800124.
- 22 Z. Xing, W. Kong, T. Wu, H. Xie, T. Wang, Y. Luo, X. Shi, A. M. Asiri, Y. Zhang and X. Sun, *ACS Sustainable Chem. Eng.*, 2019, **7**, 12692–12696.
- 23 Y. Liu, Y. Su, X. Quan, X. Fan, S. Chen, H. Yu, H. Zhao, Y. Zhang and J. Zhao, *ACS Catal.*, 2018, **8**, 1186–1191.
